# Supplementary material for: Electrical stimulation therapy for peripheral nerve injury
Source: Front Neurol. 2023 Feb 24;14:1081458. doi: 10.3389/fneur.2023.1081458 (PMC9998520; doi:10.3389/fneur.2023.1081458)
Supplement: Supplementary file 1 [file Table_1.XLSX]

## Sheet: NMES
Trial	Titel	ES	Sample	Target nerve/muscle	Surgical Treatment	parameters	position	Follow-up	Outcome Measured	results
Gordon T et al., 2010[15]	Brief post-surgical electrical stimulation accelerates axon regeneration and muscle reinnervation without affecting the functional measures in carpal tunnel syndrome patients.	nerve ES	21 Patients with carpal tunnel syndrome (CTS)	median nerve	carpel tunnel release surgery (CTRS)	1h; 20 HZ; 4-6 V, 0.1 - 0.8 ms	The median nerve. One electrode was positioned at the proximal end and the other at the distal end of the incision. To record the CMAP during the post-surgical ES, the surgeon placed two surface electrodes (TECA, Oxford Instruments), one over the motor point on the thenar eminence muscles (G1) and the other over the dorsal aspect of the first metacarpophalangeal joint (G2).	1 years	Compound Muscle Action Potential (CMAP)	1 h ES of the median nerve after surgical decompression accelerates axonal regeneration to promote complete muscle reinnervation.
Joshua N Wong et al., 2015[17]	Electrical stimulation enhances sensory recovery: a randomized controlled trial	nerve ES(in surgery)	Patients with complete digital nerve transection; 16 ES	digital nerve	plastic surgery hand clinics	1h; 20 HZ;balanced biphasic pulses; <30 V, 0.1 m	2 sterilized, Teflon-coated stainless steel wires were placed proximal to the coaptation site.	6 months	Temperature、Spatial Discrimination、Pressure Threshold、Disability	this double-blind randomized controlled trial shows, for the first time, that ES of repaired digital nerves results in significantly better temperature distinction, pressure detection, and spatial discrimination in patients with digital nerve injury.
Power HA,et al 2020[16]	Postsurgical Electrical Stimulation Enhances Recovery Following Surgery for Severe Cubital Tunnel Syndrome: A Double-Blind Randomized Controlled Trial	nerve ES(in surgery)	31 Patients with severe cubital tunnel syndrome (CuTS) ;11 w/o ES;20 w ES	cubital tunnel syndrome	cubital tunnel surgery	1h; 20 HZ;balanced biphasic pulses; <30 V, 0.1 m	2 sterile Teflon-coated stainless-steel electrodes were placed transcutaneously immediately adjacent to the ulnar nerve proximal to the site of compression.	3 years	1、motor unit number estimation (MUNE) 2、grip and key pinch strength and McGowan grade and compound muscle action potential.	PES enhanced muscle reinnervation and functional recovery following surgery for severe cubital tunnel syndrome.
Inns TB et al.,2021[24]	Factors associated with electrical stimulation-induced performance fatigability are dependent upon stimulation location	surface _ peripheral nerve stimulation (PNS) VS neuromuscular electrical stimulation (NMES)	16 healthy subjects (both PNS and NMES)	femoral nerve (PNS);the quadriceps (NMES)	_	The time of 60 contractions; 30HZ; 400 V，25 μs pulse width to induce involuntary contraction of 30% MVC.	PNS:the right inguinal fold (cathode) and on the right gluteal muscles (anode) ;NMES:right quadriceps	_	Before and after each session, a maximal voluntary contraction (MVC) was performed to assess force loss.	1. level of whole muscle force reduction is not dependent on stimulation location. 2.myoelectrical characteristics were found to change in response to NMES only, specifically M-wave duration and RD. 3.PNS requires a lower intensity of stimulation to produce the same force and is more comfortable as a result of this.
Stevens-Lapsley JE,et al 2012[20]	Early neuromuscular electrical stimulation to improve quadriceps muscle strength after total knee arthroplasty: a randomized controlled trial.	NMES surface electrodes_muscle ES	33 standard rehabilitati VS 33standard rehabilitati + ES	quadriceps muscle	total knee arthroplasty (TKA)	15 NMES repetitions were performed during each session, twice a day for 6 weeks; an intensity that was tolerable, but slightly uncomfortable; max to 100mA; a biphasic current; a symmetrical waveformat.	the distal medial and proximal lateral portions of the anterior thigh	52 weeks	1、Isometric quadriceps muscle torque.2、activation testing	The early addition of NMES effectively attenuated loss of quadriceps muscle strength and improved functional performance following TKA. The effects were most pronounced and clinically meaningful within the first month after surgery, but persisted through 1 year after surgery.
Truong AD 2017[14]	Effects of neuromuscular electrical stimulation on cytokines in peripheral blood for healthy participants: a prospective, single-blinded Study	NMES surface electrodes_muscle ES	9 healthy subjects	bilateral lower extremity muscles (quadriceps, tibialis anterior, gastrocnemius)	_	30min; 50Hz; asymmetrical biphasic waveform; contraction duration of 5 s; and pulse duration/rest of 400 μs/10 s (quadriceps) or 250 μs/5 s (tibialis anterior and gastrocnemius).	bilateral lower extremity muscles (quadriceps, tibialis anterior, gastrocnemius)	once	IL-1β、IL-6、IL-10、TNF-α	There was a significant increase in peak IL-6 from the mean pre-NMES value and a significant decrease in trough IL-1 and TNF-α. 30 min of NMES was temporally associated with changes in cytokines similar to the effects of active exercise and may mediate NMES' observed effects on reducing muscle weakness.
Mani D et al., 2018[22]	Neuromuscular electrical stimulation can improve mobility in older adults but the time course varies across tasks: Double-blind, randomized trial. Exp Gerontol.	NMES surface electrodes_muscle ES	Thirty healthy older adults (73.5 ± 4.8 yrs)	lower leg muscles	_	20min/sessions, 3 sessions/week for 6 weeks; narrow-pulse (0.26 ms) NMES applied at 50 Hz or wide-pulse (1 ms) NMES applied at 100 Hz.	lower leg muscles	6 weeks	The evaluation sessions performed at Weeks 0, 4, 7, and 10 comprised assessments of mobility, muscle strength, and force steadiness. Descriptive statistics of the participants were obtained at Week 0.	Six weeks of NMES applied to the lower leg muscles of older adults improved walking endurance, maximal walking speed, chair-rise time, rapid-step time, and strength of the plantar flexor muscles, but with different time courses. The outcome measures were similar for both the narrow-pulse and wide-pulse NMES protocols.
Acaröz Candan S et al., 2019[18]	Effects of neuromuscular electrical stimulation of quadriceps on the quadriceps strength and functional performance in nursing home residents: A comparison of short and long stimulation periods.	NMES surface electrodes_muscle ES	44 older adults;	The quadriceps muscles	_	5 min × 4 sets or 10 min × 2 sets for 6 weeks; 100Hz; a symmetrical, biphasic, squared waveform; 400 μs; The current intensity was increased until visible contraction of the muscle fibers was observed.	the motor points of the vastus medialis and rectus femoris	_	Strength measurement; Berg balance scale; Timed Up and Go test; Six-min walking test;	the present study showed that NMES with 100 Hz, either 5 min × 4 sets or 10 min × 2 sets (with 10 min of rest between the sets), might be an alternative in the improvement in functional strength of the lower extremities and functional performance, such as mobility, balance and endurance, for nursing home residents. It could be also used to prevent the loss of isometric QS in = older adults over t…
Toth MJ, et al., 2020 [19]	Utility of Neuromuscular Electrical Stimulation to Preserve Quadriceps Muscle Fiber Size and Contractility After Anterior Cruciate Ligament Injuries and Reconstruction: A Randomized, Sham-Controlled, Blinded Trial	NMES surface electrodes_muscle ES	7 w/o ES VS 9 w ES	Anterior cruciate ligament	Anterior cruciate ligament reconstruction (ACLR)	5 days/week; 1h/day; 50 Hz; a symmetrical, biphasic pulses; 400 μs	the proximal and distal aspects of the quadriceps	6 weeks	Bilateral biopsies of the vastus lateralis; Quadriceps muscle size and strength	Early NMES use reduces skeletal muscle fiber atrophy in MHC II fibers, and preserves contractility in MHC I fibers.
Pinto Damo NL et al., 2021[21]	Effects of different electrical stimulation currents and phase durations on submaximal and maximum torque, efficiency, and discomfort: a randomized crossover trial.	NMES surface electrodes_muscle ES	24 men	quadriceps muscle	_	2h; (1) 500 µs phase duration (PC 500), (2) 200 µs phase duration (PC 200), (3) 500 µs phase duration and low carrier frequency (KFAC 500: 1 kHz/Aussie current), and (4) 200 µs phase duration and high carrier frequency (KFAC 200: 2.5 kHz/Russian current).	one pair of electrodes was positioned on motor points of the vastus medialis and vastus lateralis muscles according to locations found by pen-type electrodes, as previously described. The other pair was positioned close to the proximal insertion of the quadriceps muscle, 3–5 cm below the inguinal ligament	Participants participated in five sessions, each of which lasted approximately 2 h and were at least seven days apart.	Primary outcome was NMES-evoked torque. Secondary outcomes were NMES-efficiency and NMES-induced discomfort.	KFAC and PC current applied with the same phase duration induced similar relative submaximal and maximum evoked-torque, efficiency, and perceived discomfort. However, currents with 500 µs induced higher evoked-torque, current efficiency, and perceived discomfort.
Hyer CF et al.,2021[25]	Does Functional Neuromuscular Electrical Stimulation (NMES) Influence Calf Atrophy Following Achilles Tendon Surgery? Prospective Double-Blind Randomized Controlled Trial on the Use of Immediate Postoperative Electrical Muscle Stimulation to Preserve Muscle Function and Volume	NMES	20 w/o ES VS 20 w ES	calf	Surgical repair of the Achilles tendon	20min; 75Hz; 380μs	the tibialis anterior, posterior gastrocnemius, and lateral gastrocnemius aspects of the calf musculature	12 weeks	Calf circumference, MRI volumetric measurements, pain and qualitative functional measure	1、some maintenance of calf volume per MRI.2、No statistically significant difference was found between active NMES and sham treated patients.
Piccinini G et al., 2020[26]	Efficacy of electrical stimulation of denervated muscle: A multicenter, double-blind, randomized clinical trial	surface-Electrical stimulation of denervated muscle (ESDM)	38 w/o ES VS 38 w ES	The damaged nerves and number of patients were: peroneal (23), ulnar (9), radial (3), femoral (2), and tibial (1).	_	45min; 1Hz; triangular-rectangular stimuli; 150 ms; The intensity is 0.5 mA above the lowest intensity needed to produce contraction of the muscle.	I dorsal inteosseous、Abductor digiti minimi、Extensor digitorum Communis、Brachioradialis、Vastus lateralis、Biceps femoris、Gastrocnemius、Tibialis anterior、Peroneus longus	3 months	(1) assessment of segmental strength of targeted muscles by the MRC scale; (2) detection of segmental strength of targeted muscles by means of dynamometry; (3) number of sites with fibrillation potentials out of 10 needle insertion points for each muscle on EMG examination; and (4) presence/absence of voluntary activity in targeted muscles on EMG.	muscle strength of both groups significantly improved.No statistically significant differences were found over time, either in the RG or in the SG.
Tips:
w/o ES:without ES
w ES:with ES
VS:versus

## Sheet: TENS
Trial	Titel	ES	Sample	Target nerve/muscle	Surgical Treatment	parameters	position	Follow-up	Outcome Measured	results
Avendaño-Coy J et al., 2017[59]	Effect of Unmodulated 5-kHz Alternating Currents Versus Transcutaneous Electrical Nerve Stimulation on Mechanical and Thermal Pain, Tactile Threshold, and Peripheral Nerve Conduction: A Double-Blind,	TENS(surface)	38 healthy subjects	radial nerve	_	20min; (1) TENS parameter:110Hz; asymmetrical biphasic rectangular waveform; 200 microseconds; The current intensity was limited by the participant's perception of a “strong but comfortable tingle,” right below the visible motor threshold; (2) Unmodulated 5-kHz currents were applied with a pulse width of 200 microseconds and a symmetric biphasic sinusoidal waveform.	Two pregelled, self-sticking electrodes were placed on the radial nerve tract on the dorsal forearm.	once	mechanical pain threshold (MPT), heat pain threshold (HPT), tactile threshold (TT), and peripheral nerve conduction (PNC)	1. Transcutaneous application of 5-kHz current stimulation increased somatosensory thresholds greater than placebo but not when compared with TENS; however, 5-kHz current stimulation was perceived as more comfortable by participants and showed more habituation. 2. 5-kHz current produces a quickly reversible nerve block after stimulation.
Bergeron-Vézina K et al., 2015[60]	High- and low-frequency transcutaneous electrical nerve stimulation does not reduce experimental pain in elderly individuals.	TENS(surface)	15 elderly adults (mean age: 67 ± 5 years);15 young individuals (26 ± 5 years; same study design)	lower thoracic and lumbar region	_	25min; (1) high-frequency (HF):100 Hz; 60 μs;(2) low-frequency (LF):3 Hz; 400 μs; (3) placebo (P) TENS:100 Hz; 60 μs; Intensity was adjusted to produce strong and painful sensations	Electrodes were placed on the lower thoracic and lumbar region	Volunteers received 3 interventions, during 3 separate sessions (1-week interval); Each time, the tonic heat pain test was performed on 4 occasions: (1) at baseline (T0), (2) during TENS (after 15 minutes of TENS; T1), (3) immediately after TENS (T2), and (4) 30 minutes after TENS application (T3).	Heat pain threshold	Elderly individuals do not respond to TENS as well as young adults. In particular, although effective for reducing pain in young adults, both HF- and LF-TENS did not significantly reduce pain ratings in the elderly. These observations can offer possible explanations for the contradictory results that are sometimes observed in the literature concerning TENS effectiveness.
Tonye-Geoffroy L et al., 2021[61]	Efficacy of a combination of hypnosis and transcutaneous electrical nerve stimulation for chronic non-cancer pain: A randomized controlled trial.	TENS(surface)	34 control (TENS alone, as in standard care) VS 36 intervention group (simultaneous hypnosis and TENS)	chronic peripheral neuropathic and/or nociceptive non‐cancer pain, with intact skin at the painful area.	_	30min; the optimal location of the electrodes and the most effective program.	_	6 months	The primary outcome was the change in pain intensity, assessed by VAS scores, between baseline (D0) and M3 (30 min after the session).	A decrease of pain intensity and a high level of compliance with transcutaneous electrical nerve stimulation alone or associated to hypnosis. The combination does not seem to be more efficient than transcutaneous electrical nerve stimulation alone.
Serrano-Muñoz D et al., 2020[62]	20-kHz alternating current stimulation: effects on motor and somatosensory thresholds.	TENS((surface)	14 healthy subjects	ulnar and median nerves	_	20min; 20 kHz; A charge-balanced, symmetric, biphasic sinusoidal current without modulatio; Intensity was adjusted to produce strong and painful sensations.	The proximal electrode was fixed to the skin over the path of the ulnar nerve at the epitrochlea and the distal electrode was placed on the median nerve over the carpal tunnel	once;assessed throughout the experiment at four time points: i) before stimulation (0 min), ii) during stimulation at 15 min (15 min), iii) at the end of the stimulation (20 min) and iv), at 10 min after the end of the stimulation (30 min).	Maximal handgrip strength (MHS), mechanical detection threshold (MDT) and pressure pain threshold (PPT)	High-frequency stimulation at 20 kHz suggests a partial block of nerve activity.
Finch P et al., 2019 [63]	High-Frequency (10 kHz) Electrical Stimulation of Peripheral Nerves for Treating Chronic Pain: A Double-Blind Trial of Presence vs Absence of Stimulation.	nerve ES; implanted; 10 kHz spinal cord (SCS) and peripheral nerve (PNS) stimulators	58 patients with SCS ; 11 patients with PNS	a branch of the occipital or trigeminal nerve (four patients), a limb nerve trunk (four patients), or the S1 nerve root, genito-femoral nerve or ileo-inguinal nerve (one patient each).	_	2/4 h; 10 kHz frequency as a continuous or duty cycle biphasic square wave.	1. In the dorsal epidural space across the T9/T10 intervertebral disc (58 patients); 2. Permanent PNS electrodes (Nevro) were implanted percutaneously under ultrasound control, parallel to the involved peripheral nerve and approximately 1 cm from the nerve	12 months	the modalities of pressure pain threshold, sharpness, heat, cold, and light touch.	A randomized controlled trial of PNS at 10 kHz frequency had a significant reduction in pain scores. ES has a significant clinical effect on peripheral neuromodulation systems.
Stevanato G et al., 2014[64]	Chronic post-traumatic neuropathic pain of brachial plexus and upper limb: a new technique of peripheral nerve stimulation.	nerve ES; implanted	7 Participants	brachial plexus injuries	surgery of brachial plexus injuries	24h; the pulse rate, width and voltage that produced the best response were selected. Stimulator setting was with width and pulse rate fixed for each patient.	Two on-point leads were used for the stimulation of the radial or/and the median nerve.	after 1 week and again after 1, 6 and 12 weeks	careful neurological evaluation, pain questionnaires and quantitative sensory testing (QST)	This new PNS technique of electrode implantation can result in significant pain relief in carefully selected patients with peripheral neuropathic pain due to post-traumatic nerve injuries, reducing the complication rate and preserved neuroanatomical structures.
Wilson RD et al., 2014[65]	Percutaneous peripheral nerve stimulation for chronic pain in subacromial impingement syndrome: a case series. Neuromodulation.	TENS((surface)	10 Participants	Subacromial impingement syndrome (SIS)	_	6h/day for 3 weeks; 12Hz; 20mA; 20-200 μs	The terminal branches of the axillary nerve to the middle and posterior deltoids.	5, 8, and 16 weeks	1) pain interference with activities of daily living, BPI-SF9.2) the Disabilities of the Arm, Shoulder, and Hand questionnaire (DASH). 3) active, pain-free abduction range of motion.4) the Patient Global Impression of Change (PGIC) Scale. 5) and a measure of secondary hyperalgesia, the pressure pain threshold (PPT).	PNS may be an efficacious treatment for chronic shoulder pain due to SIS. Treatment with percutaneous PNS is also associated with reduced shoulder disability, reduced pain interference, improved range of motion, and improved quality of life.
Kim Y et al., 2018[67]	Technical development of transcutaneous electrical nerve inhibition using medium-frequency alternating current.	((surface) TENS using medium-frequency alternating current (MFAC)	8 Participants	median nerve	_	10kHz; 0.3 s; Stimulation intensity was increased up to 50% and 100% of the pain threshold.	The skin overlying the median nerve near the transverse carpal ligament and the ipsilateral olecranon process.	once	1) tactile and pressure pain thresholds in the index and middle fingers before and after stimulation at 10 kHz. 2) To demonstrate the effect of tMFAC stimulation on motor inhibition, stimulation was applied while participants produced flexion forces with the index and middle fingers at target forces (50% and 90% of MVC, maximum voluntary contraction).	tMFAC stimulation immediately inhibits sensory and motor activity. This pre-clinical study demonstrates a novel technique for TENI using MFAC stimulation and showed that it can effectively inhibit both sensory perception and motor activity.
Butera KA et al., 2018[68]	Prolonged Reduction in Shoulder Strength after Transcutaneous Electrical Nerve Stimulation Treatment of Exercise-Induced Acute Muscle Pain. Pain Pract.	TENS((surface)	36 (12 TENS treatment, 12 TENS placebo, 12 control group)	shoulder(Exercise-Induced Acute Muscle Pain)	_	45min; 85Hz, 0-80mA, 75μs	around the rotator cuff	at baseline, immediately post-fatigue, 24 hours post-fatigue, 48 hours post-fatigue, and 72 hours post-fatigue.	shoulder strength, pain, mechanical pain sensitivity, and disability.	compared to the control group, the TENS treatment and TENS placebo had no significant effect on pain relief, but had a Nocebo effect on shoulder muscle strength.
Vaillancourt S et al., 2021[69]	Combining transcutaneous electrical nerve stimulation with therapeutic exercise to reduce pain in an elderly population: a pilot study.	TENS (surface)+Therapeutic exercise	18 elder (Experimental group 9;Control group 9)	chronic pain	_	45min;2/ week for 4 weeks; 100 Hz; 60ms; intensity was individually adjusted such that the stimulation was intense but not painful.	most painful region	_	the Short-Form McGill Pain Questionnaire to assess the quality of pain;the Brief Pain Inventory to assess the severity of pain and the interference of pain with physical functioning;the Beck Depression Inventory to assess the impact of pain on emotional functioning; a 0–10 numerical rating scale to assess pain intensity.	Supplementing exercise sessions with TENS does not improve the overall outcome of eld_x0002_erly patients suffering from chronic pain, but does result in short_x0002_term hypoalgesia throughout each training session.
Serrano-Muñoz D et al.,2019[73]	Soleus H-reflex modulation following transcutaneous high- and low-frequency spinal stimulation in healthy volunteers	spinal TENS (surface) and high-frequency alternating current (HFAC)	24 Participants	tibial nerve	_	40min; 10 kHz; a symmetrical biphasic current of 200 µs pulse-width; 100 mA.	the soleus metamere (S1-S2), which corresponded to bone level T10- T12.	once	The amplitude and latency of the soleus H-reflex were registered.	Transcutaneous application of spinal TENS and HFAC stimulation at a frequency of 10 kHz have a modulatory effect on the soleus H-reflex following stimulation. Although no differences were found between TENS and HFAC, TENS reduced the amplitude of Hmax and HFAC showed a higher latency of soleus H-reflex as compared with sham stimulation.

## Sheet: FES
Trial	Titel	ES	Sample	Target nerve/muscle	Surgical Treatment	parameters	position	Follow-up	Outcome Measured	results
Monaghan CC et al., 2010[77]	The effect of FES of the tibial nerve on physiological activation of leg muscles during gait.	Non-Invasive; FES	6 healthy subjects	tibial nerve	_	3min; 50 Hz; 300 ms	gastrocnemii.	once	electromyogram (EMG)	FES of the tibial nerve changes the offset timing of the tibialis anterior muscle on the stimulated side and the on- and offset timings of the tibialis anterior muscle of the leg contralateral to stimulation. Additionally, activity levels of the semitendinosus ipsilateral and tibialis anterior contralateral to the stimulated leg significantly decreased, with respect to the non-stimulated conditio…
Kido Thompson A et al., 2004[78]	Short-term effects of functional electrical stimulation on motor-evoked potentials in ankle flexor and extensor muscles.	Non-Invasive; FES	10 healthy subjects	common peroneal (CP) nerve	_	30min; 7 days ; 25 Hz; The stimulus intensity was adjusted to produce approximately 50% of the maximum M-wave for each subject.	common peroneal (CP) nerve	once	motor evoked potential (MEPh)	Using FES during walking, 30min of stimulation could increase the half-maximum peak-to-peak motor evoked potential (MEPh) of the tibial nerve, and the effect lasted for at least 30min.
Shin H 2017[79]	Exploration of Hand Grasp Patterns Elicitable Through Non-Invasive Proximal Nerve Stimulation.	Non-Invasive;FES	8 healthy subjects	ulnar and median nerves	_	10 stimulation; 25 Hz;4 mA;low current intensity (<5 mA and 100 µs pulse width) stimulation.	over the ulnar/median nerve bundles located laterally beneath the short head of the biceps brachii.	once	1. The ulnar and median nerves proximal to the elbow joint were activated transcutanously using a programmable stimulator. 2. The resultant finger flexion joint angles were recorded using a motion capture system. 3. The individual finger motions averaged across the three joints were analyzed using a cluster analysis, in order to classify the different hand grasp patterns.	All of subjects demonstrated a variety of consistent hand grasp patterns including single finger movement and coordinated multi-finger movements.
Zheng Y et al., 2019[80]	Elicited Finger and Wrist Extension Through Transcutaneous Radial Nerve Stimulation	Non-Invasive;FES	8 healthy subjects	radial Nerve	_	Fifteen 3-second stimulation trains were delivered with a 2-second resting interval for each trial; 30 Hz; 80 μs	beneath the short head of the biceps brachii at the medial side of the upper arm	once	electromyogram signals	the finger and wrist motions can be elicited both independently and in a coordinated manner, by changing the stimulation intensity and stimulation location.
Tigra W 2020[81]	Selective neural electrical stimulation restores hand and forearm movements in individuals with complete tetraplegia.	Invasive;FES	8 subjects (C5 complete motor cervical injury)	radial and median nerves	_	The frequency (up to 50 Hz); 16 V; intensity (up to 2.4 mA, 8-bit resolution), pulse width (up to 511 μs, step 2 μs).	around the median or radial nerve	once	MRC (Medical Research Council) scale; surface EMG recorded intra-operatively	Multicontact cuff electrodes and optimized current spreading over the active contacts provided isolated, compound, functional and strong movements.
Zhang Q et al., 2021 [82]	Ultrasound Echogenicity-based Assessment of Muscle Fatigue During Functional Electrical Stimulation. Annu Int Conf IEEE Eng Med Biol Soc.	Non-Invasive;FES	3 healthy subjects	tibialis anterior (TA) muscle	_	33 Hz; 25 mA; stimulation pulse width was selected individually (400 µs, 500 µs, and 450 µs for three participants).	The fibula head and distal abdomen of the TA muscle	once	1. The feasibility of computationally efficient ultrasound (US) echogenicity as a candidate indicator of FES-induced muscle fatigue. 2.Isometric dorsiflexion force, dynamic dorsiflexion angle, US images, and stimulation intensity.	The use of temporal US echogenicity from B-mode US images as the TA muscle fatigue candidate indicator during FES-induced isometric and dynamic ankle dorsiflexion motions.
Buckmire AJ et al., 2018[83]	Mitigation of excessive fatigue associated with functional electrical stimulation.	Invasive;FES	5 healthy subjects	TA or deep peroneal nerve	_	12 kHz; rectangular monophasic cathodic pulses; 32 mA; 0.25 ms	For experiments involving four electrodes, one electrode was inserted at this proximal site, two electrodes were placed at ~50% of the length of the TA with one located ~1 cm lateral to the tibial ridge and the other ~3 cm lateral to the ridge, and the fourth electrode was inserted at a distal site ~2/3 of the length of muscle and inserted into the midline of the TA.	once	Force and EMG measurements;	Excessive fatigue associated with FES is probably due to the inability of conventional FES systems to enlist the full complement of motor axons innervating muscle and can be mitigated using multiple electrodes or nerve-based electrodes.
Vromans M et al., 2018[85]	Functional electrical stimulation-induced muscular fatigue: Effect of fiber composition and stimulation frequency on rate of fatigue development.	Non-Invasive;FES	10 healthy adults	abductor pollicis brevis (APB) and vastus lateralis (VL)	_	30min; three frequencies (10, 35, and 50 Hz); abductor pollicis brevis (APB) range: 10–29 mA; vastus lateralis(VL) range: 32–63 Ma; 300 us;	parallel with the muscle fibers of abductor pollicis brevis (APB) and vastus lateralis (VL)	once	maximal voluntary contraction (MVC)	In high-frequency stimulation, VL with more fast muscle fibers was tired faster than APB with more slow muscle fibers, and the treatment time should not exceed 14-16min.
